# Supplementary material
Source: Research Square preprint supplement (doi:10.21203/rs.3.rs-8955227/v1)
Supplement: Supplementary file 1 [file 5297f27c11d64b911286b9e3.docx]

### Questionnaire(e.g.Additional file 2)

### Clinician Preferences in Patient Admission Decisions Under the DIP Payment Model S**urvey Questionnaire**

**（Version A — One of Four Parallel Versions）**

**Informed Consent Form**

Dear Clinician,

Greetings! We are conducting a study to gain deeper insights into the preferences and decision-making trade-offs clinicians consider when admitting patients under the Diagnosis-Related Group (DIP) payment system reform. We are providing you with details about this research to help you decide whether to participate.

This study collects your thoughts and information through a questionnaire. There are no right or wrong answers—simply express your genuine views. If you agree to participate, you will complete one questionnaire, estimated to take 3–5 minutes.

This questionnaire is completely anonymous. Your responses will be strictly separated from your personal information. All collected data will be used solely for aggregated analysis and will never be used for any form of personal evaluation. We promise to keep your responses strictly confidential and take necessary measures to ensure information security.

Your participation is entirely voluntary. You have the right to decline participation in this study or withdraw at any time during the process without facing any adverse consequences.

Your genuine thoughts are crucial to this research. We sincerely appreciate your time and valuable professional insights! If you understand the above and agree to participate, please proceed with the questionnaire. If you disagree, you may choose not to participate.

**A: Basic Information**

**A1: Gender:** □ Male □ Female

**A2: Age:**

□ Under 25 □ 26-35 □ 36-55 □ 56+

**A3: Educational Background**

□ Below Bachelor's Degree □ Bachelor's Degree □ Master's Degree □ Doctorate

**A4: Professional Title**

□ Resident Physician □ Attending Physician □ Associate Chief Physician □ Chief Physician

**A5: Role**

□ Regular Physician □ Head of Diagnostic and Treatment Team □ Department Director

**A6: Department**

□ Internal Medicine □ Surgery □ Obstetrics and Gynecology □ Pediatrics □ Integrative Medicine Other_____

**A7: Years of Experience**

□<5 years □5–10 years □11–20 years □>20 years

**A8: Compensation Level (Annual Salary After Tax)**

□<150,000 □150,000-250,000 □>250,000

**Scenario Simulation: Clinician Patient Admission Decision**

The following **10** questions **present identical scenarios:**

Suppose in your daily clinical practice, two patients differ **only in** terms of **DIP insurance coverage, disease complexity, medical risk, and operational efficiency**. Based on your clinical experience, select the patient you are more likely to admit. Please carefully read the description of each patient's attributes, then select the patient you prefer to admit by checking the corresponding box (□).

**Attribute Definitions and Explanations**

| **Attribute** | **Level** | **Definition** |
| --- | --- | --- |
| ****1. Clinical Complexity**** | ①Low ②High | ① Single diagnosis, favorable prognosis. ② Two or more comorbidities, unfavorable prognosis. |
| ****2. Length of Stay vs. Institutional Benchmark**** | ①At or below benchmark | ① ≤ mean institutional length of stay. |
| ②Above benchmark | ② > mean institutional length of stay. |
| ****3. Treatment Technology**** | ①Conventional  ②Innovative | ① Established clinical pathway (associated with lower CMI). ② Novel clinical pathway (associated with higher CMI). |
| ****4. Share of Service Revenue (excluding**** drugs, materials, diagnostic tests) | ①Low  ②High | ① ≤15% of total case revenue from professional fees.  ②≥35% of total case revenue from professional fees (e.g., consultation, surgery). |
| ****5. Expected DIP Margin per Case**** | ①Loss ②Break-even ③Profit | ① Payment < cost by ¥2,000. ② Payment approximately equals cost. ③ Payment > cost by ¥2,000. |
| ****6. Compliance Risk**** (related to coding and treatment) | ①None ②Moderate ③High | ① Fully compliant with DIP standards.  ② Requires modification of clinical documentation to avoid financial loss.  ③ Requires alteration of principal diagnosis to avoid financial loss. |

| **Plan One** | **Patient A** | **Patient B** |
| --- | --- | --- |
| ****Clinical Complexity**** | Low (single diagnosis, favorable prognosis) | High (≥2 complications, unfavorable prognosis) |
| ****Length of Stay vs. Institutional Benchmark**** | At or below benchmark (≤ benchmark) | Above benchmark (> benchmark) |
| ****Treatment Technology**** | Conventional (mature protocol, lower CMI) | Innovative (novel protocol, higher CMI) |
| ****Share of Service Revenue**** | High (≥35%) | Low (≤15%) |
| ****Expected DIP Margin per Case**** | Loss (payment < cost by ¥2,000) | Profit (payment > cost by ¥2,000) |
| ****Compliance Risk**** | None (fully compliant to meet cost target) | Moderate (requires case documentation adjustment to avoid loss) |
| ****Your choice?**** | **□Patient A □Patient B □Opt-out** | |

| **Plan Two** | **Patient A** | **Patient B** |
| --- | --- | --- |
| ****Clinical Complexity**** | Low (single diagnosis, favorable prognosis) | High (≥2 complications, unfavorable prognosis) |
| ****Length of Stay vs. Institutional Benchmark**** | Above benchmark (> benchmark) | At or below benchmark (≤ benchmark) |
| ****Treatment Technology**** | Innovative (novel protocol, higher CMI) | Conventional (mature protocol, lower CMI) |
| ****Share of Service Revenue**** | High (≥35%) | Low (≤15%) |
| ****Expected DIP Margin per Case**** | Loss (payment < cost by ¥2,000) | Profit (payment > cost by ¥2,000) |
| ****Compliance Risk**** | Moderate (requires case documentation adjustment to avoid loss) | High (requires modifying primary diagnosis to avoid loss) |
| **Your choice?** | **□ Patient A □ Patient B □ Opt-out** | |

| **Plan Three** | **Patient A** | **Patient B** |
| --- | --- | --- |
| ****Clinical Complexity**** | Low (single diagnosis, favorable prognosis) | High (≥2 complications, unfavorable prognosis) |
| ****Length of Stay vs. Institutional Benchmark**** | At or below benchmark (≤ benchmark) | Above benchmark (> benchmark) |
| ****Treatment Technology**** | Conventional (mature protocol, lower CMI) | Innovative (novel protocol, higher CMI) |
| ****Share of Service Revenue**** | High (≥35%) | Low (≤15%) |
| ****Expected DIP Margin per Case**** | Profit (payment > cost by ¥2,000) | Break-even (Insurance payment equals cost) |
| ****Compliance Risk**** | Moderate (requires case documentation adjustment to avoid loss) | High (requires modifying primary diagnosis to avoid loss) |
| **Your choice?** | **□ Patient A □ Patient B □ Opt-out** | |

| **Plan Four** | **Patient A** | **Patient B** |
| --- | --- | --- |
| ****Clinical Complexity**** | High (≥2 complications, unfavorable prognosis) | Low (single diagnosis, favorable prognosis) |
| ****Length of Stay vs. Institutional Benchmark**** | Above benchmark (> benchmark) | At or below benchmark (≤ benchmark) |
| ****Treatment Technology**** | Innovative (novel protocol, higher CMI) | Conventional (mature protocol, lower CMI) |
| ****Share of Service Revenue**** | High (≥35%) | Low (≤15%) |
| ****Expected DIP Margin per Case**** | Profit (payment > cost by ¥2,000) | Break-even (Insurance payment equals cost) |
| ****Compliance Risk**** | None (fully compliant to meet cost target) | Moderate (requires case documentation adjustment to avoid loss) |
| **Your choice?** | **□ Patient A □ Patient B □ Opt-out** | |

| **Plan Five** | **Patient A** | **Patient B** |
| --- | --- | --- |
| ****Clinical Complexity**** | High (≥2 complications, unfavorable prognosis) | Low (single diagnosis, favorable prognosis) |
| ****Length of Stay vs. Institutional Benchmark**** | At or below benchmark (≤ benchmark) | Above benchmark (> benchmark) |
| ****Treatment Technology**** | Innovative (novel protocol, higher CMI) | Conventional (mature protocol, lower CMI) |
| ****Share of Service Revenue**** | Low (≤15%) | High (≥35%) |
| ****Expected DIP Margin per Case**** | Break-even (insurance payment equals cost) | Loss (payment < cost by ¥2,000) |
| ****Compliance Risk**** | Moderate (requires case documentation adjustment to avoid loss) | High (requires modifying primary diagnosis to avoid loss) |
| **Your choice?** | **□ Patient A □ Patient B □ Opt-out** | |

| **Plan Six** | **Patient A** | **Patient B** |
| --- | --- | --- |
| ****Clinical Complexity**** | High (≥2 complications, unfavorable prognosis) | Low (single diagnosis, favorable prognosis) |
| ****Length of Stay vs. Institutional Benchmark**** | At or below benchmark (≤ benchmark) | Above benchmark (> benchmark) |
| ****Treatment Technology**** | Conventional (mature protocol, lower CMI) | Innovative (novel protocol, higher CMI) |
| ****Share of Service Revenue**** | Low (≤15%) | High(≥35%) |
| ****Expected DIP Margin per Case**** | Loss (payment < cost by ¥2,000) | Profit (payment > cost by ¥2,000) |
| ****Compliance Risk**** | High (requires modifying primary diagnosis to avoid loss) | None (fully compliant to meet cost target) |
| **Your choice?** | **□ Patient A □ Patient B □ Opt-out** | |

| **Plan Seven** | **Patient A** | **Patient B** |
| --- | --- | --- |
| ****Clinical Complexity**** | Low (single diagnosis, favorable prognosis) | High (≥2 complications, unfavorable prognosis) |
| ****Length of Stay vs. Institutional Benchmark**** | Above benchmark (> benchmark) | At or below benchmark (≤ benchmark) |
| ****Treatment Technology**** | Conventional (mature protocol, lower CMI) | Innovative Techniques (New Approaches, High CMI) |
| ****Share of Service Revenue**** | Low (≤15%) | High (≥35%) |
| ****Expected DIP Margin per Case**** | Break-even (Insurance payment equals cost) | Loss (payment < cost by ¥2,000) |
| ****Compliance Risk**** | High (requires modifying primary diagnosis to avoid loss) | None (fully compliant to meet cost target) |
| **Your choice?** | **□ Patient A □ Patient B □ Opt-out** | |

| **Plan Eight** | **Patient A** | **Patient B** |
| --- | --- | --- |
| ****Clinical Complexity**** | Low (single diagnosis, favorable prognosis) | High (≥2 complications, unfavorable prognosis) |
| ****Length of Stay vs. Institutional Benchmark**** | At or below benchmark (≤ benchmark) | Above benchmark (> benchmark) |
| ****Treatment Technology**** | Innovative Techniques (New Approaches, High CMI) | Conventional (mature protocol, lower CMI) |
| ****Share of Service Revenue**** | Low (≤15%) | High (≥35%) |
| ****Expected DIP Margin per Case**** | Profit (payment > cost by ¥2,000) | Break-even (insurance payment equals cost) |
| ****Compliance Risk**** | Moderate (requires case documentation adjustment to avoid loss) | High (requires modifying primary diagnosis to avoid loss) |
| **Your choice?** | **□ Patient A □ Patient B □ Opt-out** | |

| **Plan Nine** | **Patient A** | **Patient B** |
| --- | --- | --- |
| ****Clinical Complexity**** | Low (single diagnosis, favorable prognosis) | High (≥2 complications, unfavorable prognosis) |
| ****Length of Stay vs. Institutional Benchmark**** | At or below benchmark (≤ benchmark) | Above benchmark (> benchmark) |
| ****Treatment Technology**** | Conventional (mature protocol, lower CMI) | Innovative Techniques (New Approaches, High CMI) |
| ****Share of Service Revenue**** | High (≥35%) | Low (≤15%) |
| ****Expected DIP Margin per Case**** | Break-even (Insurance payment equals cost) | Loss (payment < cost by ¥2,000) |
| ****Compliance Risk**** | None (fully compliant to meet cost target) | Moderate (requires case documentation adjustment to avoid loss) |
| **Your choice?** | **□ Patient A □ Patient B □ Opt-out** | |

| **Plan Ten** | **Patient A** | **Patient B** |
| --- | --- | --- |
| ****Clinical Complexity**** | Low (single diagnosis, favorable prognosis) | High (≥2 complications, unfavorable prognosis) |
| ****Length of Stay vs. Institutional Benchmark**** | At or below benchmark (≤ benchmark) | Above benchmark (> benchmark) |
| ****Treatment Technology**** | Innovative Techniques (New Approaches, High CMI) | Conventional (mature protocol, lower CMI) |
| ****Share of Service Revenue**** | High (≥35%) | Low (≤15%) |
| ****Expected DIP Margin per Case**** | Profit (payment > cost by ¥2,000) | Loss (payment < cost by ¥2,000) |
| ****Compliance Risk**** | None (fully compliant to meet cost target) | High (requires modifying primary diagnosis to avoid loss) |
| **Your choice?** | **□Patient A □ Patient B □ Opt-out** | |
